# Supplementary material
Source: PubMed Central journal article supplement (PMC8686187)
Supplement: NIHMS1635951-supplement-1.pdf [file NIHMS1635951-supplement-1.pdf]

## Supplementary Data

**eTable 1**  
Hospitalizations for Allergic Reactions Among Children (Age, <18 Years) in the United States From 2006 to 2015

| Age group (y)       | 2006                                            | 2007          | 2008          | 2009          | 2010          | 2011          | 2012          | 2013          | 2014          | 2015          | P <sub>trend</sub> |
|---------------------|-------------------------------------------------|---------------|---------------|---------------|---------------|---------------|---------------|---------------|---------------|---------------|--------------------|
|                     | Weighted admissions (95% CI) per 100,000 visits |               |               |               |               |               |               |               |               |               |                    |
| <b>Anaphylaxis</b>  |                                                 |               |               |               |               |               |               |               |               |               |                    |
| 0-<3                | 10 (6-13)                                       | 10 (7-12)     | 9 (6-12)      | 10 (7-13)     | 13 (8-18)     | 8 (6-10)      | 11 (8-14)     | 12 (9-15)     | 12 (9-14)     | 12 (8-15)     | .14                |
| 3-<6                | 119 (71-167)                                    | 146 (104-187) | 105 (72-139)  | 137 (96-177)  | 156 (103-209) | 140 (103-176) | 182 (136-228) | 186 (133-238) | 192 (150-234) | 256 (194-319) | <.001              |
| 6-<12               | 134 (83-185)                                    | 118 (80-157)  | 119 (80-157)  | 102 (68-136)  | 144 (112-175) | 165 (127-203) | 163 (132-195) | 174 (139-209) | 219 (177-260) | 263 (202-325) | <.001              |
| 12-<18              | 102 (69-135)                                    | 64 (44-83)    | 75 (56-94)    | 100 (73-127)  | 117 (88-147)  | 98 (77-118)   | 138 (114-162) | 142 (117-166) | 163 (137-189) | 163 (135-91)  | <.001              |
| <b>Overall AAR</b>  |                                                 |               |               |               |               |               |               |               |               |               |                    |
| 0-<3                | 21 (1-26)                                       | 20 (16-24)    | 20 (16-25)    | 20 (15-24)    | 25 (18-32)    | 19 (15-22)    | 21 (17-25)    | 21 (17-25)    | 21 (17-25)    | 20 (15-24)    | .89                |
| 3-<6                | 231 (171-290)                                   | 260 (201-318) | 204 (154-254) | 247 (186-309) | 261 (194-327) | 287 (231-343) | 339 (272-405) | 347 (265-429) | 329 (273-385) | 390 (311-469) | <.001              |
| 6-<12               | 272 (210-335)                                   | 222 (173-271) | 227 (173-280) | 237 (183-290) | 279 (212-347) | 320 (258-382) | 349 (276-422) | 311 (256-365) | 361 (308-414) | 404 (331-476) | <.001              |
| 12-<18              | 188 (140-235)                                   | 129 (104-154) | 130 (107-153) | 180 (147-213) | 232 (158-305) | 231 (162-299) | 260 (213-307) | 245 (210-280) | 241 (209-274) | 236 (203-269) | <.001              |
| <b>FIA</b>          |                                                 |               |               |               |               |               |               |               |               |               |                    |
| 0-<3                | 7 (4-11)                                        | 7 (5-9)       | 6 (4-9)       | 7 (5-10)      | 9 (5-14)      | 6 (4-7)       | 8 (6-10)      | 9 (7-11)      | 7 (5-9)       | 7 (5-9)       | .70                |
| 3-<6                | 74 (25-122)                                     | 79 (48-110)   | 66 (36-97)    | 90 (58-121)   | 100 (65-135)  | 88 (56-119)   | 128 (91-166)  | 102 (65-138)  | 100 (68-133)  | 104 (65-143)  | .06                |
| 6-<12               | 74 (33-114)                                     | 53 (32-74)    | 56 (31-80)    | 51 (30-71)    | 55 (35-74)    | 82 (54-110)   | 87 (65-109)   | 79 (56-102)   | 108 (77-139)  | 134 (95-173)  | .001               |
| 12-<18              | 46 (31-62)                                      | 24 (14-34)    | 37 (26-49)    | 44 (25-62)    | 50 (33-66)    | 35 (23-47)    | 52 (39-66)    | 47 (34-61)    | 73 (55-90)    | 60 (43-77)    | <.001              |
| <b>Overall FAAR</b> |                                                 |               |               |               |               |               |               |               |               |               |                    |
| 0-<3                | 13 (9-17)                                       | 13 (10-16)    | 12 (8-15)     | 12 (9-15)     | 14 (9-20)     | 11 (8-13)     | 13 (10-16)    | 13 (10-16)    | 12 (9-14)     | 11 (8-14)     | .49                |
| 3-<6                | 111 (57-166)                                    | 100 (65-135)  | 108 (68-148)  | 121 (82-159)  | 124 (87-161)  | 128 (89-168)  | 161 (121-201) | 134 (91-176)  | 119 (82-155)  | 152 (105-200) | .09                |
| 6-<12               | 104 (59-149)                                    | 76 (50-102)   | 81 (50-112)   | 75 (49-101)   | 65 (44-87)    | 111 (77-144)  | 109 (83-134)  | 106 (78-133)  | 136 (101-171) | 158 (116-199) | .005               |
| 12-<18              | 60 (43-78)                                      | 34 (22-47)    | 45 (32-58)    | 53 (35-72)    | 59 (40-77)    | 42 (29-55)    | 61 (46-76)    | 56 (41-70)    | 80 (62-99)    | 69 (51-87)    | .01                |

Abbreviations: ARR, acute allergic reaction; CI, confidence interval; FAAR, food-induced acute allergic reaction; FIA, food-induced anaphylaxis.

NOTE: Overall AAR includes codes for anaphylaxis, FIA, and FAAR. Anaphylaxis includes FIA and non-food-related anaphylaxis. Overall FAAR includes FIA and other food-related codes.

**eTable 2**

Patient and Hospital Characteristics of Infants and Toddlers (Age, <3 Years) Hospitalized for Anaphylaxis in the United States From 2006 to 2015

| Characteristic                                    | 2006                                            | 2007         | 2008         | 2009         | 2010         | 2011       | 2012         | 2013          | 2014         | 2015         | P <sub>trend</sub> |
|---------------------------------------------------|-------------------------------------------------|--------------|--------------|--------------|--------------|------------|--------------|---------------|--------------|--------------|--------------------|
|                                                   | Weighted admissions (95% CI) per 100,000 visits |              |              |              |              |            |              |               |              |              |                    |
| Age (<3 y)                                        | 10 (6-14)                                       | 9 (6-11)     | 9 (6-12)     | 9 (6-12)     | 13 (8-19)    | 8 (6-10)   | 11 (8-14)    | 12 (9-15)     | 11 (9-14)    | 11 (8-14)    | .12                |
| Sex                                               |                                                 |              |              |              |              |            |              |               |              |              |                    |
| Male                                              | 11 (7-15)                                       | 12 (8-15)    | 11 (7-16)    | 11 (8-15)    | 14 (8-21)    | 10 (7-14)  | 14 (10-18)   | 14 (10-18)    | 15 (11-19)   | 16 (11-20)   | .06                |
| Female                                            | 8 (4-13)                                        | 6 (4-8)      | 7 (5-9)      | 7 (4-10)     | 12 (7-17)    | 5 (3-7)    | 8 (5-11)     | 10 (7-13)     | 8 (5-11)     | 6 (4-9)      | .72                |
| Race or ethnicity                                 |                                                 |              |              |              |              |            |              |               |              |              |                    |
| Non-Hispanic White                                | 12 (7-18)                                       | 11 (8-15)    | 10 (5-16)    | 8 (5-11)     | 13 (8-18)    | 7 (4-10)   | 10 (6-13)    | 10 (7-13)     | 10 (7-13)    | 8 (5-12)     | .33                |
| Non-Hispanic Black                                | 8 (2-14)                                        | 8 (3-13)     | 11 (4-19)    | 12 (4-19)    | 5 (1-10)     | 6 (2-11)   | 14 (7-21)    | 17 (8-26)     | 19 (10-28)   | 18 (9-26)    | .002               |
| Hispanic                                          | 3 (1-6)                                         | 4 (1-7)      | 7 (2-13)     | 10 (4-16)    | 16 (7-26)    | 7 (3-11)   | 8 (4-13)     | 10 (4-15)     | 11 (5-18)    | 15 (8-22)    | <.001              |
| Other                                             | 11 (5-17)                                       | 9 (4-14)     | 8 (4-11)     | 10 (5-15)    | 15 (7-23)    | 11 (6-16)  | 16 (9-22)    | 14 (8-21)     | 10 (5-15)    | 9 (5-14)     | .33                |
| Primary health insurance                          |                                                 |              |              |              |              |            |              |               |              |              |                    |
| Public                                            | 6 (4-9)                                         | 7 (4-10)     | 7 (4-10)     | 7 (5-10)     | 11 (5-16)    | 6 (3-8)    | 12 (8-16)    | 10 (6-13)     | 13 (9-17)    | 9 (6-12)     | .003               |
| Private                                           | 14 (7-21)                                       | 10 (7-14)    | 12 (6-17)    | 11 (7-15)    | 16 (9-23)    | 11 (7-14)  | 12 (8-16)    | 15 (10-19)    | 11 (7-15)    | 15 (9-20)    | .72                |
| Self-pay                                          | 4 (0-10)                                        | 6 (0-12)     | 2 (0-6)      | 15 (0-30)    | 10 (0-22)    | 3 (0-10)   | 3 (0-10)     | 6 (0-14)      | 5 (0-12)     | 4 (0-11)     | .82                |
| Other                                             | 3 (0-9)                                         | 8 (0-17)     | 16 (0-33)    | 4 (0-11)     | 14 (1-27)    | 3 (0-10)   | 0 (0-0)      | 15 (1-29)     | 4 (0-12)     | 5 (0-15)     | .68                |
| Median household income quartile <sup>a</sup>     |                                                 |              |              |              |              |            |              |               |              |              |                    |
| 1 (lowest)                                        | 6 (3-8)                                         | 6 (2-10)     | 8 (4-12)     | 8 (4-12)     | 9 (5-13)     | 6 (3-10)   | 9 (6-13)     | 12 (7-17)     | 12 (7-16)    | 8 (4-12)     | .01                |
| 2                                                 | 9 (5-14)                                        | 9 (6-13)     | 7 (3-10)     | 6 (3-9)      | 9 (1-17)     | 7 (3-10)   | 7 (3-10)     | 10 (6-14)     | 11 (6-15)    | 11 (6-16)    | .40                |
| 3                                                 | 9 (2-17)                                        | 8 (4-13)     | 9 (5-13)     | 11 (6-16)    | 16 (7-24)    | 9 (5-13)   | 11 (6-16)    | 9 (4-13)      | 10 (6-14)    | 10 (5-16)    | .76                |
| 4 (highest)                                       | 17 (9-24)                                       | 12 (7-17)    | 14 (7-22)    | 12 (7-17)    | 20 (12-28)   | 10 (5-14)  | 19 (11-26)   | 18 (12-25)    | 14 (8-20)    | 17 (10-23)   | .53                |
| Discharge quarter                                 |                                                 |              |              |              |              |            |              |               |              |              |                    |
| First quarter (Jan-Mar)                           | 9 (4-15)                                        | 7 (4-10)     | 5 (2-8)      | 6 (3-9)      | 13 (7-19)    | 6 (3-9)    | 12 (7-16)    | 9 (5-13)      | 11 (6-15)    | 12 (7-16)    | .10                |
| Second quarter (Apr-Jun)                          | 15 (9-21)                                       | 12 (7-16)    | 11 (6-16)    | 11 (6-16)    | 12 (7-17)    | 8 (4-13)   | 10 (5-15)    | 13 (8-18)     | 14 (9-20)    | 14 (8-19)    | .78                |
| Third quarter (Jul-Sep)                           | 7 (4-11)                                        | 8 (4-11)     | 10 (6-14)    | 10 (6-15)    | 14 (6-21)    | 8 (4-12)   | 12 (8-17)    | 12 (8-17)     | 11 (6-16)    | 8 (4-12)     | .24                |
| Fourth quarter (Oct-Dec)                          | 8 (3-13)                                        | 9 (5-13)     | 11 (6-15)    | 9 (4-14)     | 14 (7-21)    | 9 (5-13)   | 11 (6-15)    | 14 (9-18)     | 10 (6-14)    | —            | —                  |
| Admission on weekend                              |                                                 |              |              |              |              |            |              |               |              |              |                    |
| No                                                | 9 (5-13)                                        | 8 (6-11)     | 8 (5-11)     | 8 (5-11)     | 12 (7-17)    | 6 (4-8)    | 9 (6-11)     | 10 (7-13)     | 10 (7-12)    | 10 (7-13)    | .42                |
| Yes                                               | 14 (8-19)                                       | 11 (5-16)    | 13 (7-19)    | 15 (9-21)    | 18 (9-27)    | 15 (9-21)  | 21 (14-28)   | 20 (14-27)    | 18 (12-24)   | 16 (9-23)    | .03                |
| Hospital region                                   |                                                 |              |              |              |              |            |              |               |              |              |                    |
| Northeast                                         | 29 (10-47)                                      | 10 (5-15)    | 25 (12-39)   | 18 (8-29)    | 19 (7-31)    | 16 (9-23)  | 21 (9-32)    | 24 (14-34)    | 16 (8-25)    | 25 (14-36)   | .96                |
| Midwest                                           | 7 (0-14)                                        | 11 (4-19)    | 4 (1-7)      | 5 (1-8)      | 5 (1-9)      | 7 (3-10)   | 9 (4-14)     | 14 (6-21)     | 9 (4-13)     | 4 (1-7)      | .70                |
| South                                             | 6 (3-9)                                         | 9 (6-12)     | 4 (2-6)      | 7 (3-11)     | 9 (4-15)     | 7 (4-11)   | 8 (5-11)     | 8 (5-11)      | 13 (8-18)    | 10 (6-14)    | .02                |
| West                                              | 5 (2-9)                                         | 5 (3-8)      | 10 (5-16)    | 11 (4-18)    | 22 (5-39)    | 4 (1-7)    | 12 (7-18)    | 9 (5-13)      | 9 (4-13)     | 11 (3-18)    | .25                |
| Hospital size <sup>b</sup>                        |                                                 |              |              |              |              |            |              |               |              |              |                    |
| Small                                             | 14 (2-27)                                       | 14 (5-22)    | 7 (1-13)     | 7 (0-15)     | 27 (0-74)    | 4 (0-8)    | 14 (6-23)    | 9 (3-14)      | 9 (3-14)     | 12 (2-23)    | .57                |
| Medium                                            | 11 (0-21)                                       | 8 (4-12)     | 10 (5-15)    | 11 (4-18)    | 11 (3-19)    | 7 (3-11)   | 10 (4-17)    | 12 (7-16)     | 7 (4-10)     | 11 (6-16)    | .97                |
| Large                                             | 8 (5-12)                                        | 8 (5-11)     | 9 (5-14)     | 9 (6-12)     | 12 (8-16)    | 9 (6-12)   | 11 (8-14)    | 13 (9-17)     | 15 (11-19)   | 11 (7-14)    | .01                |
| Hospital status                                   |                                                 |              |              |              |              |            |              |               |              |              |                    |
| Rural                                             | 6 (1-10)                                        | 4 (1-8)      | 4 (1-8)      | 3 (0-6)      | 6 (0-11)     | 3 (0-7)    | 2 (0-5)      | 2 (0-5)       | 5 (0-10)     | 3 (0-8)      | .42                |
| Urban nonteaching                                 | 4 (2-7)                                         | 5 (3-8)      | 5 (3-8)      | 6 (3-9)      | 5 (2-8)      | 5 (2-7)    | 5 (2-7)      | 4 (2-6)       | 2 (0-5)      | 3 (0-6)      | .16                |
| Urban teaching                                    | 15 (8-22)                                       | 13 (9-17)    | 13 (7-19)    | 13 (8-19)    | 21 (11-31)   | 11 (8-15)  | 17 (12-22)   | 19 (14-24)    | 15 (12-19)   | 15 (11-19)   | .35                |
| Endotracheal intubation or mechanical ventilation |                                                 |              |              |              |              |            |              |               |              |              |                    |
| No                                                | 10 (6-14)                                       | 9 (6-11)     | 9 (6-12)     | 9 (6-12)     | 13 (7-18)    | 8 (6-10)   | 11 (8-14)    | 11 (9-14)     | 11 (9-14)    | 11 (8-14)    | .18                |
| Yes                                               | 11 (0-22)                                       | 14 (1-26)    | 4 (0-11)     | 7 (0-18)     | 24 (7-42)    | 12 (0-25)  | 20 (3-37)    | 28 (8-48)     | 12 (0-25)    | 21 (1-42)    | .09                |
| Chronic pulmonary disease                         |                                                 |              |              |              |              |            |              |               |              |              |                    |
| No                                                | 9 (5-13)                                        | 8 (6-10)     | 8 (5-10)     | 8 (5-11)     | 11 (7-16)    | 7 (5-10)   | 10 (7-12)    | 10 (8-13)     | 11 (8-13)    | 10 (7-13)    | .16                |
| Yes                                               | 78 (27-130)                                     | 123 (43-203) | 166 (66-266) | 138 (61-214) | 210 (96-324) | 68 (1-135) | 191 (75-306) | 244 (116-372) | 160 (57-262) | 239 (92-386) | .02                |
| Hospitalization disposition                       |                                                 |              |              |              |              |            |              |               |              |              |                    |
| Home                                              | 10 (6-14)                                       | 9 (6-11)     | 9 (6-12)     | 10 (7-13)    | 14 (8-19)    | 8 (6-11)   | 11 (8-14)    | 12 (9-15)     | 12 (9-14)    | 11 (8-15)    | .10                |
| Other medical facility                            | 4 (0-12)                                        | 4 (0-12)     | 9 (0-23)     | 0            | 4 (0-13)     | 0          | 6 (0-17)     | 0             | 6 (0-17)     | 8 (0-23)     | NC                 |
| Deceased                                          | 25 (0-74)                                       | 0            | 0            | 0            | 0            | 0          | 0            | 0             | 0            | 0            | NC                 |
| Other                                             | 13 (1-24)                                       | 16 (2-31)    | 10 (0-21)    | 3 (0-8)      | 0            | 0          | 17 (0-33)    | 9 (0-22)      | 15 (0-31)    | 0            | NC                 |

(continued on next page)

**eTable 2** (continued)

| Characteristic                                   | 2006                                            | 2007          | 2008          | 2009          | 2010          | 2011          | 2012          | 2013          | 2014          | 2015          | <i>P</i> <sub>trend</sub> |
|--------------------------------------------------|-------------------------------------------------|---------------|---------------|---------------|---------------|---------------|---------------|---------------|---------------|---------------|---------------------------|
|                                                  | Weighted admissions (95% CI) per 100,000 visits |               |               |               |               |               |               |               |               |               |                           |
| Number of procedures on discharge, median (IQR)  | 0                                               | 0             | 0             | 0             | 0             | 0             | 0             | 0             | 0 (0-0.32)    | 0 (0-0.31)    | .44                       |
| Hospitalization length of stay (d), median (IQR) | 0.6 (0.2-0.9)                                   | 0.7 (0.3-1.4) | 0.6 (0.3-0.9) | 0.7 (0.3-1.3) | 0.7 (0.3-1.3) | 0.7 (0.3-1.5) | 0.6 (0.1-1.0) | 0.7 (0.3-1.2) | 0.7 (0.3-1.6) | 0.7 (0.2-1.3) | .08                       |

Abbreviations: Apr, April; CI, confidence interval; Dec, December; IQR, interquartile range; Jan, January; Jul, July; Jun, June; Mar, March; NC, noncalculable; Oct, October; Sep, September.

<sup>a</sup>Median household income quartile: (1) 0 to 25th percentile, (2) 26th to 50th percentile, (3) 51st to 75th percentile, and (4) 76th to 100th percentile.

<sup>b</sup>Hospital size was determined by bed size and classified by the hospital region and teaching status.
